# Supplementary material
Source: publisher site journal article supplement (https://www.dovepress.com/article/604394)
Supplement: Supplementary file 1 [file 604394%20Revised%20Supplementary%20Table%201.docx]

*Supplementary Table1. Algorithm for Modified Dachengqi Decoction Dosage Adjustments Based on Individual Patient Presentation*

| Clinical Presentation | Modification | Dosage / Change |
| --- | --- | --- |
| Qi deficiency (fatigue, weak pulse) | Add Astragali Radix (Huangqi) | 20–30 g |
| Blood stasis (dark tongue, fixed abdominal pain) | Add Persicae Semen (Taoren) + Carthami Flos (Honghua | 12 g each |
| Severe abdominal distension due to qi stagnation | Increase Aurantii Fructus Immaturus (Zhishi) and Magnoliae Officinalis Cortex (Houpo); or add stir‑fried Raphani Semen (Laifuzi) | Increase by 3 g each; or add 15 g |
| Severe constipation (no bowel movement for >3 days, good tolerance) | Increase Rhei Radix et Rhizoma (Dahuang) and Natrii Sulfas (Mangxiao) | Increase by 3 g each |
| Diarrhea or excessively frequent bowel movements | Reduce Rhei Radix et Rhizoma (Dahuang) and Natrii Sulfas (Mangxiao); change decoction method from "added later" to "decocted together" | Reduce to 9 g each; modify preparation |
| Bowel movements become smooth | Omit Natrii Sulfas (Mangxiao) | Remove from formula |

*Note: The base formula comprises Rhei Radix et Rhizoma (15 g), Magnoliae Officinalis Cortex (15 g), Aurantii Fructus Immaturus (12 g), and Natrii Sulfas (12 g). Modifications are made according to the algorithm above. All herbs were decocted and administered as described in section 2.2.2.*
